# Supplementary material
Source: publisher site journal article supplement (https://www.spandidos-publications.com/8675/downloadSupplementary)

Figure S1. Pre-processing results of integrated GSE6477 and GSE16558 datasets. PC analysis was performed using normalized gene expression data to visualize sample similarity and variance. PC1 and PC2 represent the top two dimensions that explain the greatest proportion of overall variation in the dataset. MM, multiple myeloma; PC, principal component.

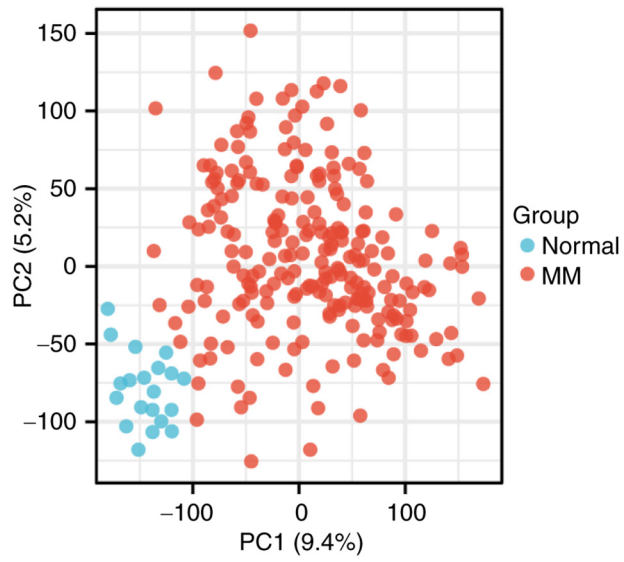

Supplement: Supplementary file [file downloadSupplementary]
